# Supplementary material
Source: HighWire-hosted journal article supplement (https://bjsm.bmj.com/content/52/20/1320)

Supplementary material 10. Forrest plot of the effect of high occupational physical activity compared to sedentary work on all-cause mortality. Individual study as well as pooled effects are presented. Data from studies on male only (upper panels) and female only (lower panels) study populations are shown. SE = standard error; CI = confidence interval; IV = Inverse variance.


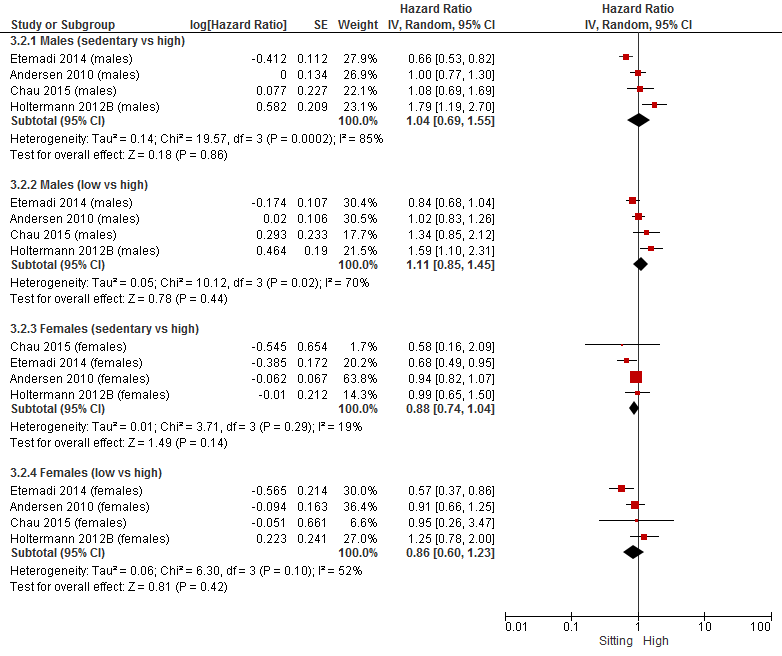

Supplement: inline-supplementary-material-9 [file inline-supplementary-material-9.docx]
